# Supplementary material for: Wintertime particulate pollution episodes in an urban valley of the Western US: a case study
Source: Copernicus journal article supplement (doi:10.5194/acp-12-10051-2012), 2012-11-02
Supplement: Supplementary file 1 [file acp-12-10051-2012-supplement.pdf]

1 **Wintertime Particulate Pollution Episodes in an Urban Valley of the Western**  
2 **U.S.: A Case Study**

3  
4  
5 *L.-W. Antony Chen<sup>1,2,\*</sup>, John G. Watson<sup>1,2</sup>, Judith C. Chow<sup>1,2</sup>, Mark C. Green<sup>1</sup>, Daniel Inouye<sup>3</sup>,*

6 *Kevin Dick<sup>3</sup>*

7 <sup>1</sup> Division of Atmospheric Sciences, Desert Research Institute, 2215 Raggio Parkway, Reno, NV  
8 89512, USA

9  
10 <sup>2</sup> State Key Laboratory of Loess and Quaternary Geology, Institute of Earth Environment,  
11 Chinese Academy of Sciences, Xi'an, China

12  
13 <sup>3</sup> Washoe County District Health Department Air Quality Management Division, Reno, NV  
14  
15

16  
17  
18  
19  
20 Address all correspondence to: L.-W. Antony Chen, Desert Research Institute, email:

21 Antony.Chen@dri.edu; phone: (775) 674-7028; fax: (775) 674-7009  
22

23

## Supplement Information

24 **Table S0.** List of organic marker compounds measured by thermal-desorption-gas  
 25 chromatography/mass spectrometry (TD-GC/MS), total organic carbon (TOC), and ion  
 26 chromatography-pulsed amperometric detection (IC-PAD) analyses.

| Group                                   | Abbreviation                                  | Chemical Species                                           | Analytical Method <sup>a</sup> |
|-----------------------------------------|-----------------------------------------------|------------------------------------------------------------|--------------------------------|
| Polycyclic Aromatic Hydrocarbons (PAHs) | Acnapy                                        | acenaphthene                                               | TD-GC-MS                       |
|                                         | Acnape                                        | acenaphthylene                                             | TD-GC-MS                       |
|                                         | Fluore                                        | fluorene                                                   | TD-GC-MS                       |
|                                         | Phenan                                        | phenanthrene                                               | TD-GC-MS                       |
|                                         | anthra                                        | anthracene                                                 | TD-GC-MS                       |
|                                         | fluora                                        | fluoranthene                                               | TD-GC-MS                       |
|                                         | pyrene                                        | pyrene                                                     | TD-GC-MS                       |
|                                         | baanth                                        | benzo[a]anthracene                                         | TD-GC-MS                       |
|                                         | chrysn                                        | chrysene                                                   | TD-GC-MS                       |
|                                         | bbfl                                          | benzo(b)fluoranthene                                       | TD-GC-MS                       |
|                                         | bjkfl                                         | benzo(j,k)fluoranthene                                     | TD-GC-MS                       |
|                                         | bbjkfl                                        | bbfl + bjkfl                                               | TD-GC-MS                       |
|                                         | baf1                                          | benzo[a]fluoranthene                                       | TD-GC-MS                       |
|                                         | bepyrn                                        | benzo[e]pyrene                                             | TD-GC-MS                       |
|                                         | bapyrn                                        | benzo[a]pyrene                                             | TD-GC-MS                       |
|                                         | peryle                                        | perylene                                                   | TD-GC-MS                       |
|                                         | retene                                        | retene                                                     | TD-GC-MS                       |
|                                         | incdpy                                        | indeno[1,2,3-cd]pyrene                                     | TD-GC-MS                       |
|                                         | dbanth                                        | dibenzo[a,h]anthracene                                     | TD-GC-MS                       |
|                                         | bghipe                                        | benzo[ghi]perylene                                         | TD-GC-MS                       |
|                                         | corone                                        | coronene                                                   | TD-GC-MS                       |
|                                         | dbaepy                                        | dibenzo(a,e)pyrene                                         | TD-GC-MS                       |
|                                         | fl9one                                        | 9-fluorenone                                               | TD-GC-MS                       |
|                                         | m_9ant                                        | 9 methyl anthracene                                        | TD-GC-MS                       |
|                                         | m_13fl                                        | 2-methylfluoranthene                                       | TD-GC-MS                       |
|                                         | cp_cdpyr                                      | cyclopenta(c,d)pyrene                                      | TD-GC-MS                       |
|                                         | baa7_12                                       | benz[a]anthracene-7,12-dione                               | TD-GC-MS                       |
| chry56m                                 | methyl chrysene                               | TD-GC-MS                                                   |                                |
| pic                                     | picene                                        | TD-GC-MS                                                   |                                |
| Hopanes & Steranes                      | hop13                                         | 18 $\alpha$ (H),21 $\beta$ (H)-22,29,30-trisnorhopane      | TD-GC-MS                       |
|                                         | hop15                                         | 17 $\alpha$ (H),21 $\beta$ (H)-22,29,30-trisnorhopane      | TD-GC-MS                       |
|                                         | hop17                                         | 17 $\alpha$ (H),21 $\beta$ (H)-30-norhopane                | TD-GC-MS                       |
|                                         | hop15a                                        | 17 $\beta$ (H),21 $\alpha$ (H)-22,29,30-norhopane          | TD-GC-MS                       |
|                                         | hop17a                                        | 17 $\beta$ (H),21 $\alpha$ (H)-30-norhopane                | TD-GC-MS                       |
|                                         | hop19                                         | 17 $\alpha$ (H),21 $\beta$ (H)-hopane                      | TD-GC-MS                       |
|                                         | hop19a                                        | 17 $\alpha$ (H),21 $\alpha$ (H)-hopane                     | TD-GC-MS                       |
|                                         | hop20                                         | 17 $\beta$ (H),21 $\alpha$ (H)-hopane                      | TD-GC-MS                       |
|                                         | hop21                                         | 22S-17 $\alpha$ (H),21 $\beta$ (H)-30-homohopane           | TD-GC-MS                       |
|                                         | hop22                                         | 22R-17 $\alpha$ (H),21 $\beta$ (H)-30-homohopane           | TD-GC-MS                       |
|                                         | hop24                                         | 22S-17 $\alpha$ (H),21 $\beta$ (H)-30,31-bishomohopane     | TD-GC-MS                       |
|                                         | hop25                                         | 22R-17 $\alpha$ (H),21 $\beta$ (H)-30,31-bishomohopane     | TD-GC-MS                       |
|                                         | hop26                                         | 22S-17 $\alpha$ (H),21 $\beta$ (H)-30,31,32-trisomohopane  | TD-GC-MS                       |
|                                         | hop27                                         | 22R-17 $\alpha$ (H),21 $\beta$ (H)-30,31,32-trishomohopane | TD-GC-MS                       |
|                                         | hop28                                         | 22S-tetrahomohopane                                        | TD-GC-MS                       |
|                                         | hop29                                         | 22R-tetrahomohopane                                        | TD-GC-MS                       |
|                                         | hop30                                         | 22S-pentashomohopane                                       | TD-GC-MS                       |
|                                         | hop31                                         | 22R-pentashomohopane                                       | TD-GC-MS                       |
|                                         | ster1                                         | $\alpha\alpha\alpha$ 20S-cholestane                        | TD-GC-MS                       |
|                                         | ster2                                         | $\alpha\beta\beta$ 20R-cholestane                          | TD-GC-MS                       |
| ster3                                   | $\alpha\beta\beta$ 20S-cholestane             | TD-GC-MS                                                   |                                |
| ster4                                   | $\alpha\alpha\alpha$ 20R-cholestane           | TD-GC-MS                                                   |                                |
| ster5                                   | $\alpha\alpha\alpha$ 20S 24S-methylcholestane | TD-GC-MS                                                   |                                |

27

28

29 Table S0 (continued)

| Group                         | Mnemonic           | Chemical Species                         | Analytical Method <sup>a</sup> |
|-------------------------------|--------------------|------------------------------------------|--------------------------------|
| Hopanes & Steranes, continued | ster6              | $\alpha\beta$ 20R 24S-methylcholestane   | TD-GC-MS                       |
|                               | ster7              | $\alpha\beta$ 20S 24S-methylcholestane   | TD-GC-MS                       |
|                               | ster8              | $\alpha\alpha$ 20R 24R-methylcholestane  | TD-GC-MS                       |
|                               | ster9              | $\alpha\alpha$ 20R,24S- methylcholestane | TD-GC-MS                       |
|                               | ster10             | $\alpha\beta$ 20R 24R-ethylcholestane    | TD-GC-MS                       |
|                               | ster11             | $\alpha\beta$ 20S 24R-ethylcholestane    | TD-GC-MS                       |
|                               | ster12             | $\alpha\alpha$ 20S 24R/S-ethylcholestane | TD-GC-MS                       |
| n-Alkanes                     | pentad             | n-pentadecane                            | TD-GC-MS                       |
|                               | hexad              | n-hexadecane                             | TD-GC-MS                       |
|                               | heptad             | n-heptadecane                            | TD-GC-MS                       |
|                               | octad              | n-octadecane                             | TD-GC-MS                       |
|                               | nonad              | n-nonadecane                             | TD-GC-MS                       |
|                               | eicosa             | n-eicosane                               | TD-GC-MS                       |
|                               | heneic             | n-heneicosane                            | TD-GC-MS                       |
|                               | docosa             | n-docosane                               | TD-GC-MS                       |
|                               | tricos             | n-tricosane                              | TD-GC-MS                       |
|                               | tetcos             | n-tetracosane                            | TD-GC-MS                       |
|                               | pencos             | n-pentacosane                            | TD-GC-MS                       |
|                               | hexcos             | n-hexacosane                             | TD-GC-MS                       |
|                               | hepcos             | n-heptacosane                            | TD-GC-MS                       |
|                               | octcos             | n-octacosane                             | TD-GC-MS                       |
|                               | noncos             | n-nonacosane                             | TD-GC-MS                       |
|                               | tricont            | n-triacontane                            | TD-GC-MS                       |
|                               | htricont           | n-hentriacontane                         | TD-GC-MS                       |
|                               | dtricont           | n-dotriacontane                          | TD-GC-MS                       |
|                               | ttricont           | n-tritriacontane                         | TD-GC-MS                       |
|                               | tetricont          | n-tettriacontane                         | TD-GC-MS                       |
| ptricont                      | n-pentatriacontane | TD-GC-MS                                 |                                |
| hxtricont                     | n-hexatriacontane  | TD-GC-MS                                 |                                |
| hptribcont                    | n-heptatriacontane | TD-GC-MS                                 |                                |
| otribcont                     | n-octatriacontane  | TD-GC-MS                                 |                                |
| ntribcont                     | n-nonatriacontane  | TD-GC-MS                                 |                                |
| tetracont                     | n-tetracontane     | TD-GC-MS                                 |                                |
| Branched Alkanes              | isoc29             | iso-nonacosane                           | TD-GC-MS                       |
|                               | anteisoc29         | anteiso-nonacosane                       | TD-GC-MS                       |
|                               | isoc30             | iso-triacontane                          | TD-GC-MS                       |
|                               | anteisoc30         | anteiso-triacontane                      | TD-GC-MS                       |
|                               | isoc31             | iso-hentriacontane                       | TD-GC-MS                       |
|                               | anteisoc31         | anteiso-hentriacontane                   | TD-GC-MS                       |
|                               | isoc32             | iso-dotriacontane                        | TD-GC-MS                       |
|                               | anteisoc32         | anteiso-dotriacontane                    | TD-GC-MS                       |
|                               | isoc33             | iso-tritriacontane                       | TD-GC-MS                       |
|                               | anteisoc33         | anteiso-tritriacontane                   | TD-GC-MS                       |
|                               | nonad2m            | 2-methylnonadecane                       | TD-GC-MS                       |
|                               | nonad3m            | 3-methylnonadecane                       | TD-GC-MS                       |
|                               | prist              | pristane                                 | TD-GC-MS                       |
| phytan                        | phytane            | TD-GC-MS                                 |                                |
| squal                         | squalane           | TD-GC-MS                                 |                                |
| Cycloalkane                   | chexa8             | n-octylcyclohexane                       | TD-GC-MS                       |
|                               | chex10             | n-decylcyclohexane                       | TD-GC-MS                       |
|                               | chex13             | n-tridecylcyclohexane                    | TD-GC-MS                       |
|                               | chex17             | n-heptadecylcyclohexane                  | TD-GC-MS                       |
|                               | chex19             | n-nonadecylcyclohexane                   | TD-GC-MS                       |
| Alkenes                       | octdecen           | 1-octadecene                             | TD-GC-MS                       |
| Water Soluble Organics        | npoc               | water soluble organic carbon (WSOC)      | TOC                            |
|                               | levg               | levoglucosan                             | IC-PAD                         |

<sup>a</sup> TD-GC-MS: thermal desorption-gas chromatography-mass spectrometry; TOC: total organic carbon; IC-PAD: ion chromatography-pulsed amperometric detection.

30  
31

32 **Table S1.** Average of PM<sub>2.5</sub> mass and chemical concentrations ( $\mu\text{g m}^{-3}$ ) and the respective  
 33 signal-to-noise ratio (SNR). (Shaded species were selected for EV-CMB modeling.)

|                                       | Site/Network                 | Central Reno Site (RENO_C/Speciation Trend Network) |                                              |                                                             |                  |
|---------------------------------------|------------------------------|-----------------------------------------------------|----------------------------------------------|-------------------------------------------------------------|------------------|
|                                       | Sampling Period              | 12/03/09 – 01/29/10                                 |                                              |                                                             |                  |
|                                       | No. of Samples               | 20 <sup>a</sup>                                     |                                              |                                                             |                  |
| Group                                 | Chemical Species             | Number of Valid Data                                | Concentration Range ( $\mu\text{g m}^{-3}$ ) | Average <sup>a</sup> Concentration ( $\mu\text{g m}^{-3}$ ) | SNR <sup>c</sup> |
| Mass                                  | PM <sub>2.5</sub>            | 20                                                  | 1.9 - 52                                     | 17                                                          | 19               |
| Elements                              | Na                           | 20                                                  | 0 - 0.15                                     | 0.042                                                       | 3.8              |
|                                       | Mg                           | 20                                                  | 0 - 0.0087                                   | 0.00083                                                     | 0.39             |
|                                       | Al                           | 20                                                  | 0.0087 - 0.17                                | 0.044                                                       | 5.6              |
|                                       | Si                           | 20                                                  | 0.026 - 0.51                                 | 0.13                                                        | 11               |
|                                       | P                            | 20                                                  | 0 - 0                                        | 0                                                           | 0                |
|                                       | S                            | 20                                                  | 0.015 - 0.48                                 | 0.14                                                        | 14               |
|                                       | Cl                           | 20                                                  | 0.00093 - 0.45                               | 0.072                                                       | 14               |
|                                       | K                            | 20                                                  | 0.014 - 0.23                                 | 0.083                                                       | 14               |
|                                       | Ca                           | 20                                                  | 0.0041 - 0.13                                | 0.038                                                       | 12               |
|                                       | Ti                           | 20                                                  | 0 - 0.023                                    | 0.0051                                                      | 4                |
|                                       | V                            | 20                                                  | 0 - 0.003                                    | 0.00063                                                     | 1                |
|                                       | Cr                           | 20                                                  | 0 - 0.017                                    | 0.0018                                                      | 4.6              |
|                                       | Mn                           | 20                                                  | 0 - 0.014                                    | 0.0019                                                      | 4.4              |
|                                       | Fe                           | 20                                                  | 0.02 - 0.27                                  | 0.097                                                       | 13               |
|                                       | Co                           | 20                                                  | 0 - 0.0017                                   | 0.0003                                                      | 0.83             |
|                                       | Ni                           | 20                                                  | 0 - 0.0021                                   | 0.00063                                                     | 1.7              |
|                                       | Cu                           | 20                                                  | 0 - 0.011                                    | 0.0033                                                      | 3.1              |
|                                       | Zn                           | 20                                                  | 0 - 0.037                                    | 0.012                                                       | 9.3              |
|                                       | As                           | 20                                                  | 0 - 0.0018                                   | 0.00026                                                     | 0.63             |
|                                       | Se                           | 20                                                  | 0 - 0.00083                                  | 0.000097                                                    | 0.26             |
|                                       | Br                           | 20                                                  | 0 - 0.0076                                   | 0.0023                                                      | 2.8              |
|                                       | Rb                           | 20                                                  | 0 - 0.0013                                   | 0.0002                                                      | 0.51             |
|                                       | Sr                           | 20                                                  | 0 - 0.0023                                   | 0.00069                                                     | 0.29             |
| Zr                                    | 20                           | 0 - 0.0049                                          | 0.00086                                      | 0.18                                                        |                  |
| Ag                                    | 20                           | 0 - 0.0023                                          | 0.00026                                      | 0.078                                                       |                  |
| Cd                                    | 20                           | 0 - 0.016                                           | 0.0016                                       | 0.35                                                        |                  |
| In                                    | 20                           | 0 - 0.012                                           | 0.0014                                       | 0.22                                                        |                  |
| Sn                                    | 20                           | 0 - 0.023                                           | 0.0029                                       | 0.48                                                        |                  |
| Sb                                    | 20                           | 0 - 0.013                                           | 0.0011                                       | 0.14                                                        |                  |
| Ba                                    | 20                           | 0 - 0.01                                            | 0.0017                                       | 0.51                                                        |                  |
| Pb                                    | 20                           | 0 - 0.0068                                          | 0.0018                                       | 1.4                                                         |                  |
| Water Soluble Ions                    | NO <sub>3</sub> <sup>-</sup> | 20                                                  | 0.18 - 11                                    | 4                                                           | 14               |
|                                       | SO <sub>4</sub> <sup>+</sup> | 20                                                  | 0.049 - 1.2                                  | 0.36                                                        | 13               |
|                                       | NH <sub>4</sub> <sup>+</sup> | 19                                                  | 0.085 - 3.7                                  | 1.2                                                         | 14               |
|                                       | Na <sup>+</sup>              | 20                                                  | 0.022 - 0.26                                 | 0.086                                                       | 1.7              |
|                                       | K <sup>+a</sup>              | 18                                                  | 0 - 0.18                                     | 0.072                                                       | 13               |
| Thermal Carbon Fractions <sup>d</sup> | OC1                          | 20                                                  | 0.21 - 5.4                                   | 1.3                                                         | 25               |
|                                       | OC2                          | 20                                                  | 0.16 - 3                                     | 1                                                           | 17               |
|                                       | OC3                          | 20                                                  | 0.25 - 3.3                                   | 1.3                                                         | 21               |
|                                       | OC4                          | 20                                                  | 0.12 - 1.1                                   | 0.63                                                        | 20               |
|                                       | OPR                          | 20                                                  | 0 - 4.6                                      | 0.68                                                        | 34               |
|                                       | OCR                          | 20                                                  | 0.8 - 17                                     | 5                                                           | 46               |
|                                       | EC1                          | 20                                                  | 0.27 - 8.4                                   | 2.4                                                         | 33               |
|                                       | EC2                          | 20                                                  | 0.022 - 0.09                                 | 0.047                                                       | 7.7              |
|                                       | EC3                          | 20                                                  | 0 - 0.011                                    | 0.00057                                                     | 7.8              |
|                                       | ECR                          | 20                                                  | 0.23 - 4                                     | 1.8                                                         | 20               |

34  
35

36 Table S1 (continued)

| Group                            | Site/Network           | Central Reno Site (RENO_C/Speciation Trend Network) |                                                             |                  |       |
|----------------------------------|------------------------|-----------------------------------------------------|-------------------------------------------------------------|------------------|-------|
|                                  | Period                 | 12/3/09 – 1/29/10                                   |                                                             |                  |       |
|                                  | # of Samples           | 20 <sup>a</sup>                                     |                                                             |                  |       |
| Species <sup>b</sup>             | # of Valid Data        | Range ( $\mu\text{g m}^{-3}$ )                      | Average <sup>a</sup> Concentration ( $\mu\text{g m}^{-3}$ ) | SNR <sup>c</sup> |       |
| Polycyclic Aromatic Hydrocarbons | Acnapy $\times 10^3$   | 20                                                  | 0 - 0.6                                                     | 0.035            | 0.47  |
|                                  | acnape $\times 10^3$   | 20                                                  | 0 - 0                                                       | 0                | 0     |
|                                  | fluore $\times 10^3$   | 20                                                  | 0 - 0.011                                                   | 0.00053          | 0.087 |
|                                  | phenan $\times 10^3$   | 20                                                  | 0 - 0.69                                                    | 0.069            | 2.8   |
|                                  | anthra $\times 10^3$   | 20                                                  | 0 - 0.22                                                    | 0.011            | 0.19  |
|                                  | fluora $\times 10^3$   | 20                                                  | 0 - 2.3                                                     | 0.3              | 13    |
|                                  | pyrene $\times 10^3$   | 20                                                  | 0 - 2.7                                                     | 0.38             | 17    |
|                                  | baanth $\times 10^3$   | 20                                                  | 0.043 - 2.4                                                 | 0.46             | 20    |
|                                  | chrysn $\times 10^3$   | 20                                                  | 0 - 2.1                                                     | 0.45             | 18    |
|                                  | bbfl $\times 10^3$     | 20                                                  | 0.13 - 1.6                                                  | 0.5              | 20    |
|                                  | bjkfl $\times 10^3$    | 20                                                  | 0.075 - 1.5                                                 | 0.43             | 20    |
|                                  | bbjkfl $\times 10^3$   | 20                                                  | 0.22 - 3.1                                                  | 0.93             | 28    |
|                                  | bafl $\times 10^3$     | 20                                                  | 0 - 0.69                                                    | 0.18             | 10    |
|                                  | bepyrn $\times 10^3$   | 20                                                  | 0.068 - 1.3                                                 | 0.39             | 20    |
|                                  | bapyrn $\times 10^3$   | 20                                                  | 0.094 - 2.1                                                 | 0.6              | 20    |
|                                  | peryle $\times 10^3$   | 20                                                  | 0 - 0.42                                                    | 0.049            | 0.97  |
|                                  | retene $\times 10^3$   | 20                                                  | 0.15 - 13                                                   | 1.7              | 20    |
|                                  | incdpy $\times 10^3$   | 20                                                  | 0.033 - 1.6                                                 | 0.39             | 20    |
|                                  | dbanth $\times 10^3$   | 20                                                  | 0 - 0.21                                                    | 0.048            | 11    |
|                                  | bghipe $\times 10^3$   | 20                                                  | 0.036 - 1.6                                                 | 0.45             | 20    |
|                                  | corone $\times 10^3$   | 20                                                  | 0 - 0.43                                                    | 0.12             | 19    |
|                                  | dbaepy $\times 10^3$   | 20                                                  | 0 - 0.31                                                    | 0.07             | 20    |
|                                  | fl9one $\times 10^3$   | 20                                                  | 0 - 0.5                                                     | 0.051            | 2.5   |
|                                  | m_9ant $\times 10^3$   | 20                                                  | 0 - 0                                                       | 0                | 0     |
|                                  | m_13fl $\times 10^3$   | 20                                                  | 0 - 0.47                                                    | 0.05             | 5.9   |
|                                  | cp_cdpyr $\times 10^3$ | 20                                                  | 0 - 8.5                                                     | 2.3              | 11    |
| baa7_12 $\times 10^3$            | 20                     | 0.015 - 0.59                                        | 0.16                                                        | 20               |       |
| chry56m $\times 10^3$            | 20                     | 0 - 0.23                                            | 0.041                                                       | 3.3              |       |
| pic $\times 10^3$                | 20                     | 0 - 0.19                                            | 0.029                                                       | 2.2              |       |
| Hopanes & Steranes               | hop13 $\times 10^3$    | 20                                                  | 0.0066 - 0.16                                               | 0.052            | 20    |
|                                  | hop15 $\times 10^3$    | 20                                                  | 0.0094 - 0.2                                                | 0.066            | 20    |
|                                  | hop17 $\times 10^3$    | 20                                                  | 0.018 - 0.51                                                | 0.19             | 20    |
|                                  | hop15a $\times 10^3$   | 20                                                  | 0.0019 - 0.091                                              | 0.03             | 20    |
|                                  | hop17a $\times 10^3$   | 20                                                  | 0.0014 - 0.099                                              | 0.03             | 20    |
|                                  | hop19 $\times 10^3$    | 20                                                  | 0.012 - 0.46                                                | 0.16             | 20    |
|                                  | hop19a $\times 10^3$   | 20                                                  | 0 - 0.024                                                   | 0.0093           | 5.5   |
|                                  | hop20 $\times 10^3$    | 20                                                  | 0 - 0.06                                                    | 0.02             | 17    |
|                                  | hop21 $\times 10^3$    | 20                                                  | 0.0064 - 0.23                                               | 0.082            | 20    |
|                                  | hop22 $\times 10^3$    | 20                                                  | 0.0082 - 0.27                                               | 0.093            | 20    |
|                                  | hop24 $\times 10^3$    | 20                                                  | 0 - 0.14                                                    | 0.05             | 14    |
|                                  | hop25 $\times 10^3$    | 20                                                  | 0 - 0.095                                                   | 0.032            | 17    |
|                                  | hop26 $\times 10^3$    | 20                                                  | 0.003 - 0.073                                               | 0.027            | 20    |
|                                  | hop27 $\times 10^3$    | 20                                                  | 0.004 - 0.075                                               | 0.026            | 20    |
|                                  | hop28 $\times 10^3$    | 20                                                  | -0.0027 - 0.063                                             | 0.02             | 20    |
|                                  | hop29 $\times 10^3$    | 20                                                  | -0.0022 - 0.042                                             | 0.014            | 20    |
|                                  | hop30 $\times 10^3$    | 20                                                  | -0.0037 - 0.077                                             | 0.023            | 20    |
|                                  | hop31 $\times 10^3$    | 20                                                  | -0.0036 - 0.045                                             | 0.015            | 18    |
|                                  | ster1 $\times 10^3$    | 20                                                  | 0.0032 - 0.13                                               | 0.047            | 20    |
|                                  | ster2 $\times 10^3$    | 20                                                  | 0.0038 - 0.093                                              | 0.033            | 20    |
| ster3 $\times 10^3$              | 20                     | 0.0037 - 0.079                                      | 0.027                                                       | 20               |       |
| ster4 $\times 10^3$              | 20                     | 0.0053 - 0.11                                       | 0.041                                                       | 20               |       |
| ster5 $\times 10^3$              | 20                     | 0.0016 - 0.13                                       | 0.034                                                       | 20               |       |
| ster6 $\times 10^3$              | 20                     | 0.0031 - 0.079                                      | 0.027                                                       | 20               |       |
| ster7 $\times 10^3$              | 20                     | 0.0033 - 0.093                                      | 0.03                                                        | 20               |       |
| ster8 $\times 10^3$              | 20                     | 0.0038 - 0.1                                        | 0.033                                                       | 20               |       |

37 Table S1 (continued)

|                               | Site/Network             | Central Reno Site (RENO_C/Speciation Trend Network) |                                |                                                             |                  |
|-------------------------------|--------------------------|-----------------------------------------------------|--------------------------------|-------------------------------------------------------------|------------------|
|                               | Period                   | 12/3/09 – 1/29/10                                   |                                |                                                             |                  |
|                               | # of Samples             | 20 <sup>a</sup>                                     |                                |                                                             |                  |
| Group                         | Species <sup>b</sup>     | # of Valid Data                                     | Range ( $\mu\text{g m}^{-3}$ ) | Average <sup>a</sup> Concentration ( $\mu\text{g m}^{-3}$ ) | SNR <sup>c</sup> |
| Hopanes & Steranes, continued | ster9 $\times 10^3$      | 20                                                  | 0.0025 - 0.06                  | 0.017                                                       | 20               |
|                               | ster10 $\times 10^3$     | 20                                                  | 0.0036 - 0.12                  | 0.036                                                       | 20               |
|                               | ster11 $\times 10^3$     | 20                                                  | 0.0082 - 0.18                  | 0.063                                                       | 20               |
|                               | ster12 $\times 10^3$     | 20                                                  | 0.02 - 0.54                    | 0.21                                                        | 20               |
| Water Soluble Organics        | npoc $\times 10^3$       | 18                                                  | 230 - 7000                     | 1900                                                        | 10               |
|                               | levg $\times 10^{3a}$    | 18                                                  | 93 - 1300                      | 430                                                         | 16               |
| n-Alkanes                     | pentad $\times 10^3$     | 20                                                  | 0 - 0.34                       | 0.041                                                       | 0.44             |
|                               | hexad $\times 10^3$      | 20                                                  | 0 - 0.56                       | 0.052                                                       | 0.53             |
|                               | heptad $\times 10^3$     | 20                                                  | 0 - 0.94                       | 0.17                                                        | 1.2              |
|                               | octad $\times 10^3$      | 20                                                  | 0 - 1                          | 0.22                                                        | 1.6              |
|                               | nonad $\times 10^3$      | 20                                                  | 0 - 2.6                        | 0.37                                                        | 2.4              |
|                               | eicosa $\times 10^3$     | 20                                                  | 0.23 - 8                       | 0.92                                                        | 20               |
|                               | heneic $\times 10^3$     | 20                                                  | 0.25 - 9.6                     | 1.2                                                         | 20               |
|                               | docosa $\times 10^3$     | 20                                                  | 0.22 - 6.9                     | 1.2                                                         | 20               |
|                               | tricoso $\times 10^3$    | 20                                                  | 0.32 - 5.8                     | 1.3                                                         | 20               |
|                               | tetcos $\times 10^3$     | 20                                                  | 0.33 - 5.1                     | 1.6                                                         | 20               |
|                               | pencos $\times 10^3$     | 20                                                  | 0.11 - 5.2                     | 1.6                                                         | 20               |
|                               | hexcos $\times 10^3$     | 20                                                  | 0.23 - 3.3                     | 1.2                                                         | 20               |
|                               | hepcos $\times 10^3$     | 20                                                  | 0.4 - 4.6                      | 1.5                                                         | 20               |
|                               | octcos $\times 10^3$     | 20                                                  | 0.2 - 3.2                      | 1                                                           | 20               |
|                               | noncos $\times 10^3$     | 20                                                  | 0.17 - 4.2                     | 1.3                                                         | 20               |
|                               | tricont $\times 10^3$    | 20                                                  | 0.15 - 2.1                     | 0.77                                                        | 20               |
|                               | htricont $\times 10^3$   | 20                                                  | 0.5 - 3.6                      | 1.6                                                         | 20               |
|                               | dtricont $\times 10^3$   | 20                                                  | 0 - 2                          | 0.76                                                        | 15               |
|                               | ttricont $\times 10^3$   | 20                                                  | 0.53 - 3.2                     | 1.4                                                         | 20               |
|                               | tetricont $\times 10^3$  | 20                                                  | 0.28 - 2.4                     | 1                                                           | 20               |
| ptricont $\times 10^3$        | 20                       | 0.6 - 3                                             | 1.3                            | 20                                                          |                  |
| hxtricont $\times 10^3$       | 20                       | 0.63 - 2.5                                          | 1.1                            | 20                                                          |                  |
| hptribcont $\times 10^3$      | 20                       | 0 - 0                                               | 0                              | 0                                                           |                  |
| otribcont $\times 10^3$       | 20                       | 0 - 0                                               | 0                              | 0                                                           |                  |
| ntribcont $\times 10^3$       | 20                       | 0 - 0                                               | 0                              | 0                                                           |                  |
| tetracont $\times 10^3$       | 20                       | 0 - 0                                               | 0                              | 0                                                           |                  |
| Branched Alkanes              | isoc29 $\times 10^3$     | 20                                                  | 0 - 0.36                       | 0.13                                                        | 5.6              |
|                               | anteisoc29 $\times 10^3$ | 20                                                  | 0 - 0.29                       | 0.071                                                       | 2.6              |
|                               | isoc30 $\times 10^3$     | 20                                                  | 0 - 0.37                       | 0.075                                                       | 1.7              |
|                               | anteisoc30 $\times 10^3$ | 20                                                  | 0.13 - 0.85                    | 0.39                                                        | 20               |
|                               | isoc31 $\times 10^3$     | 20                                                  | 0.28 - 1.1                     | 0.57                                                        | 20               |
|                               | anteisoc31 $\times 10^3$ | 20                                                  | 0 - 0.63                       | 0.22                                                        | 4.5              |
|                               | isoc32 $\times 10^3$     | 20                                                  | 0 - 0.83                       | 0.37                                                        | 7.8              |
|                               | anteisoc32 $\times 10^3$ | 20                                                  | 0.39 - 1.3                     | 0.72                                                        | 20               |
|                               | isoc33 $\times 10^3$     | 20                                                  | 0.34 - 1                       | 0.6                                                         | 20               |
|                               | anteisoc33 $\times 10^3$ | 20                                                  | 0.14 - 0.74                    | 0.31                                                        | 20               |
|                               | nonad2m $\times 10^3$    | 20                                                  | 0 - 0.26                       | 0.06                                                        | 7.3              |
|                               | nonad3m $\times 10^3$    | 20                                                  | 0 - 0.37                       | 0.055                                                       | 8                |
|                               | prist $\times 10^3$      | 20                                                  | 0 - 0.38                       | 0.048                                                       | 0.71             |
|                               | phytan $\times 10^3$     | 20                                                  | 0 - 0.63                       | 0.094                                                       | 1.5              |
| squal $\times 10^3$           | 20                       | 0 - 0.18                                            | 0.05                           | 16                                                          |                  |
| Cycloalkane                   | chexa8 $\times 10^3$     | 20                                                  | 0 - 0.017                      | 0.00086                                                     | 0.11             |
|                               | chex10 $\times 10^3$     | 20                                                  | 0 - 0                          | 0                                                           | 0                |
|                               | chex13 $\times 10^3$     | 20                                                  | 0 - 0.074                      | 0.011                                                       | 0.92             |
|                               | chex17 $\times 10^3$     | 20                                                  | 0.019 - 0.3                    | 0.075                                                       | 20               |
|                               | chex19 $\times 10^3$     | 20                                                  | 0 - 0.32                       | 0.092                                                       | 15               |
| Alkenes                       | octdecen $\times 10^3$   | 20                                                  | 0 - 1.1                        | 0.24                                                        | 3.4              |

38

39 Table S1 (continued)

|                                | Site/Network                     | Central Reno Site (RENO_C/Speciation Trend Network) |                           |                                                        |                  |
|--------------------------------|----------------------------------|-----------------------------------------------------|---------------------------|--------------------------------------------------------|------------------|
|                                | Period                           | 12/3/09 – 1/29/10                                   |                           |                                                        |                  |
|                                | # of Samples                     | 20 <sup>a</sup>                                     |                           |                                                        |                  |
| Group                          | Species                          | # of Valid Data                                     | Range (Mm <sup>-1</sup> ) | Average <sup>a</sup> Concentration (Mm <sup>-1</sup> ) | SNR <sup>c</sup> |
| Absorption (Mm <sup>-1</sup> ) | <i>b</i> <sub>abs</sub> (370 nm) | 20                                                  | 5.5 - 86                  | 39                                                     | 20               |
|                                | <i>b</i> <sub>abs</sub> (880 nm) | 20                                                  | 1.8 - 50                  | 19                                                     | 20               |

40

41 <sup>a</sup> Average of 20 samples except for some water-soluble species.42 <sup>b</sup> See Table S0 for organic species names.43 <sup>c</sup> Signal-to-noise ratio (SNR) is calculated by  $\sqrt{\sum_i C_i^2 / \sum_i \sigma_i^2}$  where  $C_i$  and  $\sigma_i$  are value and uncertainty of each

44 measurement.

45 <sup>d</sup> OC and EC were measured by the IMPROVE\_A TOR protocol (Chow et al., 2007; 2011) where OC1–OC4 are the  
 46 organic carbon evolved at 140, 280, 480, and 580 °C, respectively, in a 100% He atmosphere; EC1–EC3 are the  
 47 elemental carbon evolved at 580, 740, and 840 °C, respectively, in a 98% He/2% O<sub>2</sub> atmosphere; OPR is pyrolyzed  
 48 OC; OCR is OC by reflectance (OC1+OC2+OC3+OC4+OPR); and ECR is EC by reflectance (EC1+EC2+EC3-  
 49 OPR). It is assumed that the analytical uncertainties are similar to those reported by the IMPROVE program for the  
 50 urban Phoenix site (PHOE1) for the same sampling period. The uncertainty of each RENO\_C carbon measurement  
 51 was assigned as the uncertainty of PHOE1 measurement with the closest concentration level.

52

53

54 Table S2. Source profiles assembled for EV-CMB receptor modeling. (Shaded entries designate  
55 profiles included in the final source apportionment.)

| Category        | Subcategory                      | Mnemonic | Year | Location                   | Description                                                                                                                                                                     | Reference                     |
|-----------------|----------------------------------|----------|------|----------------------------|---------------------------------------------------------------------------------------------------------------------------------------------------------------------------------|-------------------------------|
| Geological      | Paved Road Dust                  | TahoeNRD | 2003 | Lake Tahoe                 | Resuspension soil dust (PM <sub>2.5</sub> ) from Village Lakeshore                                                                                                              | (Kuhns et al., 2004)          |
|                 |                                  | TahoeSRD | 2003 | Lake Tahoe                 | Resuspension soil dust (PM <sub>2.5</sub> ) from Mays/Southwood                                                                                                                 |                               |
|                 |                                  | GPVRDC   | 1995 | Las Vegas                  | Composite of 7 paved road dust samples                                                                                                                                          | (Green et al., 2004)          |
|                 |                                  | FDPVRD   | 1997 | Central California         | Composite of 2 paved road dust samples from San Joaquin Valley                                                                                                                  | (Chow et al., 2003)           |
|                 |                                  | RNOPVRD  | 2010 | Reno                       | Paved road dust samples collected along the two north lanes of the S 12th Ave, a well-traveled road a few blocks south of Anderson school near the Reno site (301 State Street) | This study                    |
|                 | Unpaved Road Dust & Surface Soil | GUPRDC   | 1995 | Las Vegas                  | Composite of 2 unpaved road dust samples                                                                                                                                        | (Green et al., 2004)          |
|                 |                                  | FDUNPVRD | 1997 | Central California         | Composite of 2 unpaved road dust samples from San Joaquin Valley                                                                                                                | (Chow et al., 2003)           |
|                 |                                  | GSOILC   | 1995 | Las Vegas                  | Composite of 5 desert soil samples                                                                                                                                              | (Green et al., 2004)          |
|                 |                                  | RNOSOIL  | 2010 | Reno                       | Mixture of surface soil from bare ground vacant lot along the east side of Anderson School near the Reno site (301 State Street)                                                | This study                    |
|                 | Construction                     | CONST    | 1997 | Central California         | Composite of 2 construction & earthmoving dust profiles                                                                                                                         | (Chow et al., 2003)           |
|                 | Asian Dust                       | AD_IMPRO | 2001 | California and Oregon      | Composite of 3 IMPROVE samples (4/29/1998 at CRLA1 and LAVO1 and 4/16/2001 at LAVO1) representing Asian dust impact                                                             | This study                    |
|                 | De-Icing Agents                  | RNOSalt1 | 2010 | Reno, NV                   | Reno de-icing material from Public Works stockpile. 5:1 mixture of rock salt and Paiute Pit granite sand                                                                        | This study                    |
|                 |                                  | RNOSalt2 | 2010 | Reno, NV                   | Reno de-icing material from Public Works stockpile. 5:1 mixture of rock salt and Paiute Pit granite sand                                                                        | This study                    |
| Mobile          | Diesel Exhaust                   | LVOOnRD  | 2003 | Las Vegas                  | On-road diesel exhaust, a composite                                                                                                                                             | (Green et al., 2004)          |
|                 |                                  | LVOOffRD | 2003 | Las Vegas                  | Off-road diesel exhaust, a composite                                                                                                                                            |                               |
|                 |                                  | DIESEL   | 2001 | Southern California        | Composite of medium and heavy duty diesel vehicles                                                                                                                              | (Fujita et al., 2007a; 2007b) |
|                 | Gasoline Exhaust                 | LVOOnRSW | 2003 | Las Vegas                  | Onroad gasoline vehicle exhaust at Swenson                                                                                                                                      | (Green et al., 2004)          |
|                 |                                  | GAS      | 2001 | Southern California        | Composite of low and high gasoline emitters                                                                                                                                     | (Fujita et al., 2007a; 2007b) |
| Biomass Burning | Residential Wood Combustion      | CRBURN_H | 2001 | Northern Nevada            | California hardwood (oak, cedar, almond) combustion in a fireplace                                                                                                              | (Fitz et al., 2004)           |
|                 |                                  | CRBURN_S | 2001 | Northern Nevada            | California softwood (pine, tamarack) combustion in a fireplace                                                                                                                  |                               |
|                 |                                  | LTFP_H   | 2004 | Lake Tahoe                 | Residential hardwood combustion in a fireplace                                                                                                                                  | (Kuhns et al., 2004)          |
|                 |                                  | LTFP_S   | 2004 | Lake Tahoe                 | Residential softwood combustion in a fireplace                                                                                                                                  |                               |
|                 |                                  | LTWS_H   | 2004 | Lake Tahoe                 | Residential hardwood combustion in a woodstove                                                                                                                                  |                               |
|                 |                                  | LTWS_S   | 2004 | Lake Tahoe                 | Residential softwood combustion in a woodstove                                                                                                                                  |                               |
| Coal Combustion | Coal-Fired Power Plant           | MZPPC    | 1995 | Northern Colorado          | Composite of ten coal-fired boiler emission samples                                                                                                                             | (Watson et al., 2001)         |
|                 |                                  | BVCFPP   | 1999 | Texas                      | Composite of 26 profiles of stack emissions from coal-fired boilers in Texas.                                                                                                   | (Chow et al., 2004)           |
| Oil Combustion  | Oil-Fired Plant                  | IMGPEC   | 1992 | Southern California Border | Composite of six Mexicali oil-fueled glass plant emission profiles collected on 12/17/92.                                                                                       | (Watson and Chow, 2001)       |
|                 |                                  | BVCAT1   | 1999 | Texas                      | Composite of 5 profiles of stack emissions from a Texas petroleum refinery's catalytic cracker                                                                                  | (Chow et al., 2004)           |
| Cement          | Cement Factory                   | BVCEM    | 1999 | Texas                      | Composite of 11 profiles of cement kiln emissions                                                                                                                               | (Chow et al., 2004)           |



Table S-2 (continued)

| Category  | Subcategory         | Mnemonic | Year | Location            | Description                                                                              | Reference             |
|-----------|---------------------|----------|------|---------------------|------------------------------------------------------------------------------------------|-----------------------|
| Cooking   | Meat Cooking        | BVCOOK   | 2000 | Southern California | Composite of charcoal chicken, propane chicken, and charcoal hamburger cooking profiles. | (Chow et al., 2004)   |
| Secondary | Secondary Bisulfate | AMBSUL   |      |                     | Ammonium bisulfate                                                                       | (Watson et al., 1994) |
|           | Secondary Sulfate   | AMSUL    |      |                     | Ammonium sulfate                                                                         |                       |
|           | Secondary Nitrate   | AMNIT    |      |                     | Ammonium nitrate                                                                         |                       |
|           | Secondary OC        | SOC      |      |                     | Secondary organic carbon                                                                 |                       |

56

57

58 **Table S3.** PM<sub>2.5</sub> source profile abundances (in % of PM<sub>2.5</sub> mass) for the four geological materials  
 59 collected in this study. See profile descriptions in Table S2.

| Group                                                            | Species                      | RNOPVRD         | RNOSOIL         | RNOSalt1        | RNOSalt2       |
|------------------------------------------------------------------|------------------------------|-----------------|-----------------|-----------------|----------------|
| Mass                                                             | PM <sub>2.5</sub>            | 100 ± 7.3       | 100 ± 7.6       | 100 ± 7.4       | 100 ± 7.8      |
| Elements                                                         | Na                           | 0 ± 0.41        | 0 ± 0.55        | 2.7 ± 0.28      | 3.3 ± 0.81     |
|                                                                  | Mg                           | 0 ± 0.14        | 0 ± 0.18        | 0 ± 0.038       | 0 ± 0.21       |
|                                                                  | Al                           | 4.4 ± 0.32      | 4.1 ± 0.3       | 5.1 ± 0.38      | 3.6 ± 0.28     |
|                                                                  | Si                           | 18 ± 1.3        | 16 ± 1.1        | 15 ± 1.1        | 10 ± 0.78      |
|                                                                  | P                            | 0.044 ± 0.0058  | 0 ± 0.0061      | 0 ± 0.0013      | 0 ± 0.0071     |
|                                                                  | S                            | 0.45 ± 0.033    | 0.37 ± 0.028    | 0.96 ± 0.071    | 1.8 ± 0.13     |
|                                                                  | Cl                           | 0.091 ± 0.0081  | 0.081 ± 0.0087  | 9.7 ± 0.72      | 12 ± 0.89      |
|                                                                  | K                            | 1.3 ± 0.094     | 0.86 ± 0.064    | 1.4 ± 0.1       | 2.1 ± 0.16     |
|                                                                  | Ca                           | 2.9 ± 0.21      | 7.5 ± 0.55      | 3.6 ± 0.26      | 2 ± 0.15       |
|                                                                  | Ti                           | 0.53 ± 0.039    | 0.23 ± 0.019    | 0.37 ± 0.028    | 0.23 ± 0.021   |
|                                                                  | V                            | 0.014 ± 0.0047  | 0.013 ± 0.0061  | 0.011 ± 0.0015  | 0.019 ± 0.0072 |
|                                                                  | Cr                           | 0.029 ± 0.005   | 0.1 ± 0.0097    | 0.1 ± 0.0076    | 1.8 ± 0.13     |
|                                                                  | Mn                           | 0.094 ± 0.016   | 0.11 ± 0.021    | 0.12 ± 0.01     | 0.25 ± 0.03    |
|                                                                  | Fe                           | 5 ± 0.36        | 3.8 ± 0.28      | 5.2 ± 0.38      | 10 ± 0.78      |
|                                                                  | Co                           | 0 ± 0.0046      | 0.0058 ± 0.0061 | 0 ± 0.0013      | 0 ± 0.0071     |
|                                                                  | Ni                           | 0.012 ± 0.013   | 0.033 ± 0.018   | 0.042 ± 0.0049  | 0.71 ± 0.058   |
|                                                                  | Cu                           | 0.021 ± 0.017   | 0.017 ± 0.022   | 0.01 ± 0.0047   | 0.12 ± 0.027   |
|                                                                  | Zn                           | 0.083 ± 0.0077  | 0.012 ± 0.0061  | 0.011 ± 0.0015  | 0.034 ± 0.006  |
|                                                                  | As                           | 0 ± 0.0046      | 0 ± 0.0061      | 0 ± 0.0013      | 0 ± 0.0071     |
|                                                                  | Se                           | 0 ± 0.0046      | 0 ± 0.0061      | 0 ± 0.0013      | 0 ± 0.0071     |
|                                                                  | Br                           | 0 ± 0.0046      | 0 ± 0.0061      | 0.0046 ± 0.0013 | 0.075 ± 0.0093 |
| Rb                                                               | 0.0005 ± 0.0046              | 0.002 ± 0.0061  | 0.0061 ± 0.0014 | 0.0003 ± 0.0071 |                |
| Sr                                                               | 0.044 ± 0.0056               | 0.048 ± 0.007   | 0.054 ± 0.0042  | 0.034 ± 0.0075  |                |
| Zr                                                               | 0 ± 0.0075                   | 0.0037 ± 0.0099 | 0.017 ± 0.0025  | 0.03 ± 0.012    |                |
| Ag                                                               | 0 ± 0.011                    | 0 ± 0.014       | 0 ± 0.0029      | 0.0025 ± 0.016  |                |
| Cd                                                               | 0.0045 ± 0.013               | 0.014 ± 0.018   | 0 ± 0.0037      | 0 ± 0.021       |                |
| In                                                               | 0.0094 ± 0.014               | 0.0086 ± 0.019  | 0.0018 ± 0.004  | 0 ± 0.022       |                |
| Sn                                                               | 0 ± 0.014                    | 0 ± 0.019       | 0.0028 ± 0.004  | 0 ± 0.022       |                |
| Sb                                                               | 0 ± 0.023                    | 0 ± 0.03        | 0.0038 ± 0.0063 | 0 ± 0.035       |                |
| Ba                                                               | 0.016 ± 0.053                | 0.023 ± 0.071   | 0 ± 0.015       | 0.073 ± 0.083   |                |
| Pb                                                               | 0.0086 ± 0.0051              | 0 ± 0.0067      | 0.0055 ± 0.0015 | 0 ± 0.0078      |                |
| Water Soluble Ions                                               | NO <sub>3</sub> <sup>-</sup> | 0.12 ± 0.12     | 0.12 ± 0.16     | 0.022 ± 0.034   | 0.28 ± 0.19    |
|                                                                  | SO <sub>4</sub> <sup>+</sup> | 0.037 ± 0.12    | 0.31 ± 0.16     | 2.8 ± 0.2       | 4.9 ± 0.41     |
|                                                                  | NH <sub>4</sub> <sup>+</sup> | 0.068 ± 0.12    | 0 ± 0.16        | 0 ± 0.034       | 0 ± 0.19       |
|                                                                  | Na <sup>+</sup>              | 0.19 ± 0.12     | 0.2 ± 0.16      | 7.1 ± 0.52      | 11 ± 0.88      |
|                                                                  | K <sup>+</sup>               | 0.23 ± 0.12     | 0 ± 0.16        | 0.16 ± 0.036    | 0.99 ± 0.2     |
| Thermal Carbon Fractions (IMPROVE_A protocol, Chow et al., 2007) | OC1                          | 0.43 ± 0.031    | 0.45 ± 0.033    | 0 ± 0           | 0.27 ± 0.02    |
|                                                                  | OC2                          | 1.2 ± 0.088     | 0.8 ± 0.059     | 0.086 ± 0.0062  | 1 ± 0.075      |
|                                                                  | OC3                          | 7.5 ± 0.54      | 2.4 ± 0.18      | 0.65 ± 0.047    | 1.8 ± 0.13     |
|                                                                  | OC4                          | 4.1 ± 0.3       | 1.9 ± 0.14      | 0.37 ± 0.027    | 0.42 ± 0.031   |
|                                                                  | OPR                          | 1.6 ± 0.12      | 0.4 ± 0.03      | 0.014 ± 0.001   | 0 ± 0          |
|                                                                  | OCR                          | 15 ± 1.7        | 5.9 ± 1.2       | 1.1 ± 0.24      | 3.4 ± 1.2      |
|                                                                  | EC1                          | 2.1 ± 0.15      | 0.4 ± 0.03      | 0.014 ± 0.001   | 0 ± 0          |
|                                                                  | EC2                          | 0.8 ± 0.058     | 0.26 ± 0.019    | 0 ± 0           | 0 ± 0          |
|                                                                  | EC3                          | 0 ± 0           | 0 ± 0           | 0 ± 0           | 0 ± 0          |
| ECR                                                              | 1.3 ± 0.2                    | 0.26 ± 0.23     | 0 ± 0.049       | 0 ± 0.27        |                |

60  
 61  
 62  
 63  
 64  
 65  
 66  
 67

Table S3 (continued).

| Group                                   | Species <sup>a</sup>       | RNOPVRD                 | RNOSOIL      | RNOSalt1     | RNOSalt2     |
|-----------------------------------------|----------------------------|-------------------------|--------------|--------------|--------------|
| Polycyclic Aromatic Hydrocarbons (PAHs) | Acnapy × 10 <sup>3</sup>   | 0 ± 76                  | 0 ± 97       | 0 ± 21       | 0 ± 110      |
|                                         | acnape × 10 <sup>3</sup>   | 0 ± 22                  | 0 ± 29       | 0 ± 6.2      | 0 ± 33       |
|                                         | fluore × 10 <sup>3</sup>   | 0 ± 6.5                 | 0 ± 8.3      | 0 ± 1.8      | 0 ± 9.4      |
|                                         | phenan × 10 <sup>3</sup>   | 0 ± 18                  | 0 ± 23       | 0 ± 4.9      | 0 ± 26       |
|                                         | anthra × 10 <sup>3</sup>   | 0 ± 62                  | 0 ± 80       | 0 ± 17       | 0 ± 90       |
|                                         | fluora × 10 <sup>3</sup>   | 0 ± 18                  | 0 ± 23       | 0 ± 4.9      | 0 ± 26       |
|                                         | pyrene × 10 <sup>3</sup>   | 0 ± 17                  | 0 ± 22       | 0 ± 4.7      | 0 ± 25       |
|                                         | baanth × 10 <sup>3</sup>   | 0 ± 8.3                 | 0 ± 11       | 0 ± 2.3      | 0 ± 12       |
|                                         | chrysn × 10 <sup>3</sup>   | 0 ± 15                  | 0 ± 19       | 0 ± 4.1      | 0 ± 22       |
|                                         | bbfl × 10 <sup>3</sup>     | 0 ± 8.6                 | 0 ± 11       | 0 ± 2.4      | 0 ± 12       |
|                                         | bjkfl × 10 <sup>3</sup>    | 0 ± 17                  | 0 ± 22       | 0 ± 4.7      | 0 ± 25       |
|                                         | bbjkfl × 10 <sup>3</sup>   | 0 ± 19                  | 0 ± 25       | 0 ± 5.3      | 0 ± 28       |
|                                         | bafl × 10 <sup>3</sup>     | 0 ± 15                  | 0 ± 19       | 0 ± 4.2      | 0 ± 22       |
|                                         | bepyrn × 10 <sup>3</sup>   | 0 ± 7.8                 | 0 ± 10       | 0 ± 2.1      | 0 ± 11       |
|                                         | bapyrn × 10 <sup>3</sup>   | 0 ± 17                  | 0 ± 22       | 0 ± 4.6      | 0 ± 24       |
|                                         | peryle × 10 <sup>3</sup>   | 0 ± 35                  | 0 ± 45       | 0 ± 9.6      | 0 ± 51       |
|                                         | retene × 10 <sup>3</sup>   | 0 ± 8.4                 | 0 ± 11       | 0.23 ± 0.35  | 0 ± 12       |
|                                         | incdpy × 10 <sup>3</sup>   | 0 ± 6.2                 | 0 ± 7.9      | 0 ± 1.7      | 0 ± 9        |
|                                         | dbanth × 10 <sup>3</sup>   | 0 ± 3.7                 | 0 ± 4.7      | 0 ± 1        | 0 ± 5.3      |
|                                         | bghipe × 10 <sup>3</sup>   | 0 ± 11                  | 0 ± 14       | 0 ± 2.9      | 0 ± 15       |
|                                         | corone × 10 <sup>3</sup>   | 0 ± 6.2                 | 0 ± 7.9      | 0 ± 1.7      | 0 ± 8.9      |
|                                         | dbaepy × 10 <sup>3</sup>   | 0 ± 1.7                 | 0 ± 2.1      | 0 ± 0.46     | 0 ± 2.4      |
|                                         | fl9one × 10 <sup>3</sup>   | 0 ± 15                  | 0 ± 19       | 0 ± 4        | 0 ± 21       |
|                                         | m_9ant × 10 <sup>3</sup>   | 0 ± 270                 | 0 ± 350      | 0 ± 74       | 0 ± 390      |
|                                         | m_13fl × 10 <sup>3</sup>   | 0 ± 6.6                 | 0 ± 8.5      | 0 ± 1.8      | 0 ± 9.6      |
|                                         | cp_cdpyr × 10 <sup>3</sup> | 0 ± 170                 | 0 ± 220      | 0 ± 47       | 0 ± 250      |
|                                         | baa7_12 × 10 <sup>3</sup>  | 0 ± 6.8                 | 0 ± 8.8      | 0.44 ± 0.45  | 0 ± 9.9      |
|                                         | chry56m × 10 <sup>3</sup>  | 0 ± 7.6                 | 0 ± 9.7      | 0 ± 2.1      | 0 ± 11       |
|                                         | pic × 10 <sup>3</sup>      | 0 ± 7.9                 | 0 ± 10       | 0 ± 2.2      | 0 ± 11       |
|                                         | Hopanes & Steranes         | hop13 × 10 <sup>3</sup> | 0.19 ± 0.56  | 0.088 ± 0.68 | 0.018 ± 0.14 |
| hop15 × 10 <sup>3</sup>                 |                            | 0.33 ± 0.62             | 0.17 ± 0.7   | 0 ± 0.32     | 0 ± 1.7      |
| hop17 × 10 <sup>3</sup>                 |                            | 0.81 ± 0.9              | 0.43 ± 0.71  | 0.027 ± 0.13 | 0 ± 1.7      |
| hop15a × 10 <sup>3</sup>                |                            | 0.22 ± 0.77             | 0.15 ± 0.96  | 0 ± 0.25     | 0 ± 1.3      |
| hop17a × 10 <sup>3</sup>                |                            | 0 ± 1.3                 | 0.1 ± 1.3    | 0.019 ± 0.28 | 0 ± 1.8      |
| hop19 × 10 <sup>3</sup>                 |                            | 1.2 ± 1.4               | 0.54 ± 1.2   | 0 ± 0.52     | 0 ± 2.7      |
| hop19a × 10 <sup>3</sup>                |                            | 0.12 ± 0.67             | 0 ± 1.4      | 0 ± 0.3      | 0 ± 1.6      |
| hop20 × 10 <sup>3</sup>                 |                            | 0.18 ± 0.55             | 0.065 ± 0.67 | 0 ± 0.22     | 0 ± 1.2      |
| hop21 × 10 <sup>3</sup>                 |                            | 0.47 ± 0.97             | 0.26 ± 1.1   | 0 ± 0.27     | 0 ± 1.4      |
| hop22 × 10 <sup>3</sup>                 |                            | 0.54 ± 0.92             | 0.32 ± 1     | 0 ± 0.23     | 0 ± 1.2      |
| hop24 × 10 <sup>3</sup>                 |                            | 0.3 ± 0.51              | 0 ± 3.3      | 0 ± 0.72     | 0 ± 3.8      |
| hop25 × 10 <sup>3</sup>                 |                            | 0.3 ± 0.67              | 0.18 ± 0.8   | 0 ± 0.39     | 0 ± 2.1      |
| hop26 × 10 <sup>3</sup>                 |                            | 0.25 ± 0.52             | 0.14 ± 0.61  | 0 ± 0.13     | 0 ± 0.67     |
| hop27 × 10 <sup>3</sup>                 |                            | 0.25 ± 0.76             | 0.096 ± 0.92 | 0 ± 0.2      | 0 ± 1        |
| hop28 × 10 <sup>3</sup>                 |                            | 0.2 ± 0.6               | 0.13 ± 0.74  | 0 ± 0.16     | 0 ± 0.83     |
| hop30 × 10 <sup>3</sup>                 |                            | 0.24 ± 0.77             | 0.19 ± 0.95  | 0 ± 0.2      | 0 ± 1.1      |
| hop31 × 10 <sup>3</sup>                 |                            | 0.15 ± 3                | 0.18 ± 1.8   | 0 ± 0.39     | 0 ± 2.1      |
| ster1 × 10 <sup>3</sup>                 |                            | 0.25 ± 0.59             | 0.092 ± 0.69 | 0 ± 0.22     | 0.077 ± 0.78 |
| ster2 × 10 <sup>3</sup>                 |                            | 0.12 ± 0.54             | 0.052 ± 0.67 | 0 ± 0.14     | 0 ± 0.76     |
| ster3 × 10 <sup>3</sup>                 |                            | 0.11 ± 0.81             | 0.04 ± 1     | 0 ± 0.14     | 0 ± 0.76     |
| ster4 × 10 <sup>3</sup>                 |                            | 0.32 ± 1                | 0.041 ± 1.2  | 0 ± 0.1      | 0 ± 0.54     |
| ster5 × 10 <sup>3</sup>                 |                            | 0.17 ± 0.73             | 0.06 ± 0.91  | 0 ± 0.1      | 0 ± 0.53     |
| ster6 × 10 <sup>3</sup>                 |                            | 0.17 ± 0.63             | 0.043 ± 0.78 | 0 ± 0.13     | 0 ± 0.68     |
| ster7 × 10 <sup>3</sup>                 |                            | 0.23 ± 0.36             | 0.065 ± 0.36 | 0 ± 0.12     | 0 ± 0.66     |
| ster8 × 10 <sup>3</sup>                 |                            | 0.22 ± 0.89             | 0.051 ± 1.1  | 0 ± 0.047    | 0 ± 0.25     |
| ster9 × 10 <sup>3</sup>                 |                            | 0.031 ± 0.52            | 0.061 ± 0.67 | 0 ± 0.047    | 0 ± 0.25     |
| ster10 × 10 <sup>3</sup>                | 0.12 ± 1.7                 | 0.053 ± 2.1             | 0 ± 0.11     | 0 ± 0.58     |              |
| ster11 × 10 <sup>3</sup>                | 0.13 ± 1.4                 | 0.05 ± 1.7              | 0 ± 0.086    | 0 ± 0.46     |              |
| ster12 × 10 <sup>3</sup>                | 0.4 ± 0.99                 | 0.14 ± 1.2              | 0 ± 0.23     | 0 ± 1.2      |              |

Table S-3 (continued).

| Group                        | Species <sup>a</sup>             | RNOPVRD   | RNOSOIL    | RNOSalt1   | RNOSalt2  |
|------------------------------|----------------------------------|-----------|------------|------------|-----------|
| Water Soluble Organics       | npoc × 10 <sup>3</sup>           | - - -     | - - -      | - - -      | - - -     |
|                              | levg × 10 <sup>3</sup>           | - - -     | - - -      | - - -      | - - -     |
| n-Alkanes                    | pentad × 10 <sup>3</sup>         | 4.4 ± 5.3 | 5.5 ± 6.6  | 0 ± 17     | 5.3 ± 6.7 |
|                              | hexad × 10 <sup>3</sup>          | 4.7 ± 4.7 | 7.5 ± 7.2  | 0 ± 20     | 6 ± 5.8   |
|                              | heptad × 10 <sup>3</sup>         | 0 ± 89    | 0 ± 110    | 0 ± 24     | 0 ± 130   |
|                              | octad × 10 <sup>3</sup>          | 0 ± 74    | 0 ± 95     | 0 ± 20     | 0 ± 110   |
|                              | nonad × 10 <sup>3</sup>          | 0 ± 95    | 0 ± 120    | 0 ± 26     | 0 ± 140   |
|                              | eicosa × 10 <sup>3</sup>         | 0 ± 44    | 0 ± 57     | 0 ± 12     | 0 ± 64    |
|                              | heneic × 10 <sup>3</sup>         | 0 ± 28    | 0 ± 36     | 0 ± 7.8    | 0 ± 41    |
|                              | docosa × 10 <sup>3</sup>         | 0 ± 32    | 0 ± 41     | 0 ± 8.9    | 0 ± 47    |
|                              | tricoso × 10 <sup>3</sup>        | 0 ± 18    | 0 ± 23     | 0 ± 4.9    | 0 ± 26    |
|                              | tetcos × 10 <sup>3</sup>         | 0 ± 19    | 0 ± 24     | 0 ± 5.2    | 0 ± 27    |
|                              | pencos × 10 <sup>3</sup>         | 0.8 ± 1   | 0 ± 16     | 0 ± 3.4    | 0 ± 18    |
|                              | hexcos × 10 <sup>3</sup>         | 0 ± 16    | 0 ± 20     | 0 ± 4.3    | 0 ± 23    |
|                              | hepcos × 10 <sup>3</sup>         | 0 ± 16    | 0 ± 20     | 0 ± 4.3    | 0 ± 23    |
|                              | octcos × 10 <sup>3</sup>         | 0 ± 18    | 0 ± 23     | 0 ± 5      | 0 ± 26    |
|                              | noncos × 10 <sup>3</sup>         | 0 ± 19    | 0 ± 24     | 0 ± 5.1    | 0 ± 27    |
|                              | tricont × 10 <sup>3</sup>        | 0 ± 25    | 0 ± 32     | 0 ± 6.9    | 0 ± 36    |
|                              | htricont × 10 <sup>3</sup>       | 0 ± 32    | 0 ± 41     | 0 ± 8.8    | 0 ± 46    |
|                              | dtricont × 10 <sup>3</sup>       | 0 ± 41    | 0 ± 52     | 0 ± 11     | 0 ± 59    |
|                              | ttricont × 10 <sup>3</sup>       | 2.4 ± 2.3 | 0 ± 57     | 0 ± 12     | 0 ± 64    |
|                              | tetricont × 10 <sup>3</sup>      | 2.8 ± 2.7 | 0 ± 48     | 0 ± 10     | 0 ± 55    |
| ptricont × 10 <sup>3</sup>   | 5.9 ± 5.7                        | 0 ± 63    | 0 ± 13     | 0 ± 71     |           |
| hxtricont × 10 <sup>3</sup>  | 9.4 ± 9.1                        | 0 ± 180   | 0 ± 39     | 0 ± 200    |           |
| hptribcont × 10 <sup>3</sup> | 0 ± 860                          | 0 ± 1100  | 0 ± 240    | 0 ± 1300   |           |
| otribcont × 10 <sup>3</sup>  | 0 ± 1300                         | 0 ± 1700  | 0 ± 360    | 0 ± 1900   |           |
| ntribcont × 10 <sup>3</sup>  | 0 ± 1100                         | 0 ± 1500  | 0 ± 310    | 0 ± 1700   |           |
| tetracont × 10 <sup>3</sup>  | 0 ± 1200                         | 0 ± 1500  | 0 ± 330    | 0 ± 1700   |           |
| Branched Alkanes             | isoc29 × 10 <sup>3</sup>         | 0 ± 15    | 0 ± 19     | 0 ± 4.1    | 0 ± 22    |
|                              | anteisoc29 × 10 <sup>3</sup>     | 0 ± 15    | 0 ± 19     | 0 ± 4.1    | 0 ± 22    |
|                              | isoc30 × 10 <sup>3</sup>         | 0 ± 24    | 0 ± 30     | 0 ± 6.5    | 0 ± 34    |
|                              | anteisoc30 × 10 <sup>3</sup>     | 0 ± 24    | 0 ± 30     | 0 ± 6.5    | 0 ± 34    |
|                              | isoc31 × 10 <sup>3</sup>         | 0 ± 32    | 0 ± 41     | 0 ± 8.8    | 0 ± 46    |
|                              | anteisoc31 × 10 <sup>3</sup>     | 0 ± 32    | 0 ± 41     | 0 ± 8.8    | 0 ± 46    |
|                              | isoc32 × 10 <sup>3</sup>         | 0 ± 39    | 0 ± 50     | 0 ± 11     | 0 ± 57    |
|                              | anteisoc32 × 10 <sup>3</sup>     | 0 ± 39    | 0 ± 50     | 0 ± 11     | 0 ± 57    |
|                              | isoc33 × 10 <sup>3</sup>         | 0 ± 44    | 0 ± 56     | 0 ± 12     | 0 ± 63    |
|                              | anteisoc33 × 10 <sup>3</sup>     | 0 ± 44    | 3.1 ± 2.9  | 0 ± 12     | 0 ± 63    |
|                              | nonad2m × 10 <sup>3</sup>        | 0 ± 4.7   | 0 ± 6      | 0 ± 1.3    | 0 ± 6.8   |
|                              | nonad3m × 10 <sup>3</sup>        | 0 ± 3.9   | 0 ± 5      | 0 ± 1.1    | 0 ± 5.7   |
|                              | prist × 10 <sup>3</sup>          | 0 ± 45    | 3.2 ± 3.9  | 0 ± 12     | 0 ± 65    |
|                              | phytan × 10 <sup>3</sup>         | 2.1 ± 2.8 | 3.2 ± 3.9  | 0 ± 10     | 0 ± 54    |
| squal × 10 <sup>3</sup>      | 0 ± 2.5                          | 0 ± 3.3   | 0 ± 0.7    | 0 ± 3.7    |           |
| Group                        | Species <sup>a</sup>             | RNOPVRD   | RNOSOIL    | RNOSalt1   | RNOSalt2  |
| Cycloalkane                  | chexa8 × 10 <sup>3</sup>         | 0 ± 8.6   | 0 ± 11     | 0 ± 2.3    | 0 ± 12    |
|                              | chex10 × 10 <sup>3</sup>         | 0 ± 9.1   | 0.76 ± 7.7 | 0 ± 2.5    | 0 ± 13    |
|                              | chex13 × 10 <sup>3</sup>         | 0 ± 8.1   | 0 ± 10     | 0 ± 2.2    | 0 ± 12    |
|                              | chex17 × 10 <sup>3</sup>         | 0 ± 2.5   | 0 ± 3.1    | 0 ± 0.67   | 0 ± 3.6   |
|                              | chex19 × 10 <sup>3</sup>         | 0 ± 4.6   | 0 ± 5.9    | 0 ± 1.3    | 0 ± 6.7   |
| Alkenes                      | octdecen × 10 <sup>3</sup>       | 0 ± 46    | 0 ± 59     | 0.95 ± 2.7 | 0 ± 67    |
| Light Transmission           | <i>b</i> <sub>abs</sub> (370 nm) | 55 ± 2.8  | 29 ± 1.5   | 39 ± 1.9   | 36 ± 1.8  |
|                              | <i>b</i> <sub>abs</sub> (880 nm) | 20 ± 1    | 9.5 ± 0.47 | 8.3 ± 0.42 | 21 ± 1.1  |

<sup>a</sup> See Table S0 for organic species names.

76 **Table S4.** EV-CMB sensitivity tests for the 1/17/2010 and 1/5/2010 sample. PM<sub>2.5</sub> source  
77 contribution estimates (SCEs ± 1σ) in μg m<sup>-3</sup> and performance measures (i.e., r<sup>2</sup>, χ<sup>2</sup>,  
78 and %MASS) are reported. The best profile combination, marked in bold, were found in Trial V  
79 and selected for EV-CMB modeling of all samples.

|                 |                      | RENO_C: 9.08 ± 0.52 μg m <sup>-3</sup> ; collected on 1/17/2010) |             |             |             |                    |             |             |
|-----------------|----------------------|------------------------------------------------------------------|-------------|-------------|-------------|--------------------|-------------|-------------|
| Source          | Profile <sup>a</sup> | I                                                                | II          | III         | IV          | V                  | VI          | VII         |
| Geological      | RNOPVRD              | 0.54 ± 0.17                                                      | 0.56 ± 0.16 | 0.64 ± 0.12 | 0.78 ± 0.12 | <b>0.78 ± 0.13</b> |             |             |
|                 | RNOSOIL              |                                                                  |             |             |             |                    | 0.36 ± 0.13 | 0.45 ± 0.10 |
|                 | RNOSALT1             |                                                                  |             |             |             |                    |             |             |
|                 | RNOSALT2             | 0.37 ± 0.12                                                      | 0.37 ± 0.11 | 0.29 ± 0.09 | 0.26 ± 0.09 | <b>0.25 ± 0.09</b> | 0.48 ± 0.09 | 0.43 ± 0.08 |
| Gasoline        | GAS                  | 0.64 ± 0.31                                                      | 0.48 ± 0.25 |             | 0.14 ± 0.15 | <b>0.15 ± 0.16</b> | 0.63 ± 0.31 | 0.32 ± 0.25 |
|                 | LVOOnRGas            |                                                                  |             | 0.03 ± 0.01 |             |                    |             |             |
| Diesel          | DIESEL               | 1.58 ± 0.41                                                      | 1.36 ± 0.37 | 0.52 ± 0.28 | 1.31 ± 0.35 | <b>1.68 ± 0.39</b> | 1.69 ± 0.43 | 1.67 ± 0.43 |
|                 | LVOOnRDie            |                                                                  |             |             |             |                    |             |             |
| Biomass Burning | CRBURN_H             | 2.77 ± 0.25                                                      | 2.50 ± 0.26 | 1.78 ± 0.29 | 1.27 ± 0.27 | <b>1.36 ± 0.29</b> | 2.13 ± 0.23 | 1.31 ± 0.31 |
|                 | CRBURN_S             | -                                                                | -           | 1.80 ± 0.65 |             |                    |             |             |
|                 | LTWS_H               |                                                                  |             |             | 2.07 ± 0.82 | <b>2.82 ± 0.89</b> |             | 2.80 ± 1.01 |
|                 | LTWS_S               |                                                                  |             |             |             |                    | 1.19 ± 0.38 |             |
| Secondary       | AMSUL                | 0.04 ± 0.09                                                      | 0.07 ± 0.07 | 0.15 ± 0.03 | 0.12 ± 0.06 | <b>0.10 ± 0.07</b> | 0.04 ± 0.09 | 0.08 ± 0.07 |
|                 | AMBSUL               |                                                                  |             |             |             |                    |             |             |
|                 | AMNIT                | 1.36 ± 0.17                                                      | 1.36 ± 0.17 | 1.38 ± 0.17 | 1.38 ± 0.17 | <b>1.38 ± 0.17</b> | 1.37 ± 0.17 | 1.38 ± 0.17 |
|                 | SOC                  |                                                                  |             |             |             |                    |             |             |
| Cooking         | BVCOOK               |                                                                  | 1.16 ± 0.57 | 1.91 ± 0.37 | 1.57 ± 0.56 |                    |             |             |
|                 | r <sup>2</sup>       | 0.75                                                             | 0.77        | 0.81        | 0.94        | <b>0.92</b>        | 0.93        | 0.91        |
|                 | χ <sup>2</sup>       | 5.93                                                             | 6.59        | 10.23       | 1.71        | <b>1.66</b>        | 1.42        | 1.82        |
|                 | %MASS                | 80.4                                                             | 86.5        | 93.6        | 98.0        | <b>93.9</b>        | 86.9        | 93.0        |

80 <sup>a</sup> See Table S2 for a short description of each source profile. Profiles not included in a test are left blank. A dash is  
81 used to indicate profiles that were included in the test but eliminated by the model (due to negative contributions).  
82

|                 |                      | RENO_C: 39.2 ± 2.0 μg m <sup>-3</sup> ; collected on 1/5/2010) |              |              |              |                     |              |              |
|-----------------|----------------------|----------------------------------------------------------------|--------------|--------------|--------------|---------------------|--------------|--------------|
| Source          | Profile <sup>a</sup> | I                                                              | II           | III          | IV           | V                   | VI           | VII          |
| Geological      | RNOPVRD              | 2.09 ± 0.37                                                    | 2.15 ± 0.35  | 2.30 ± 0.33  | 2.27 ± 0.33  | <b>2.22 ± 0.33</b>  |              |              |
|                 | RNOSOIL              |                                                                |              |              |              |                     | 1.11 ± 0.27  | 1.14 ± 0.21  |
|                 | RNOSALT1             |                                                                |              |              |              |                     |              |              |
|                 | RNOSALT2             | 0.93 ± 0.28                                                    | 0.92 ± 0.27  | 0.84 ± 0.27  | 0.95 ± 0.26  | <b>0.98 ± 0.27</b>  | 1.60 ± 0.24  | 1.70 ± 0.23  |
| Gasoline        | GAS                  | 0.84 ± 0.48                                                    | 0.62 ± 0.39  |              | 0.00 ± 0.21  | <b>0.01 ± 0.21</b>  | 0.87 ± 0.53  | 0.08 ± 0.24  |
|                 | LVOOnRGas            |                                                                |              | 0.09 ± 0.05  |              |                     |              |              |
| Diesel          | DIESEL               | 5.36 ± 1.07                                                    | 3.99 ± 1.02  | 3.70 ± 0.88  | 3.82 ± 0.95  | <b>4.99 ± 1.03</b>  | 6.02 ± 1.17  | 4.92 ± 1.07  |
|                 | LVOOnRDie            |                                                                |              |              |              |                     |              |              |
| Biomass Burning | CRBURN_H             | 9.90 ± 0.82                                                    | 8.15 ± 0.78  | 8.60 ± 0.79  | 6.17 ± 0.87  | <b>7.94 ± 1.03</b>  | 6.94 ± 0.70  | 7.89 ± 1.07  |
|                 | CRBURN_S             | -                                                              | -            | -            |              |                     |              |              |
|                 | LTWS_H               |                                                                |              |              | 4.81 ± 1.88  | <b>7.24 ± 2.29</b>  |              | 7.73 ± 2.45  |
|                 | LTWS_S               |                                                                |              |              |              |                     | 3.32 ± 1.01  |              |
| Secondary       | AMSUL                | 0.16 ± 0.21                                                    | 0.24 ± 0.17  | 0.31 ± 0.14  | 0.31 ± 0.15  | <b>0.25 ± 0.18</b>  | 0.14 ± 0.23  | 0.21 ± 0.18  |
|                 | AMBSUL               |                                                                |              |              |              |                     |              |              |
|                 | AMNIT                | 10.68 ± 1.32                                                   | 10.70 ± 1.32 | 10.71 ± 1.32 | 10.72 ± 1.32 | <b>10.71 ± 1.32</b> | 10.71 ± 1.32 | 10.71 ± 1.32 |
|                 | SOC                  |                                                                |              |              |              |                     |              |              |
| Cooking         | BVCOOK               |                                                                | 7.20 ± 1.61  | 7.66 ± 1.52  | 7.28 ± 1.60  |                     |              |              |
|                 | r <sup>2</sup>       | 0.84                                                           | 0.86         | 0.86         | 0.96         | <b>0.95</b>         | 0.92         | 0.92         |
|                 | χ <sup>2</sup>       | 4.90                                                           | 5.40         | 5.65         | 1.39         | <b>1.61</b>         | 2.18         | 2.28         |
|                 | %MASS                | 76.5                                                           | 86.7         | 87.3         | 92.8         | <b>87.6</b>         | 78.4         | 87.7         |

83 <sup>a</sup> See Table S2 for a short description of each source profile. Profiles not included in a test are left blank. A dash is  
84 used to indicate profiles that were included in the test but eliminated by the model (due to negative contributions).  
85  
86

87 Table S5. MPIN matrix for the 1/17/2010 and 1/5/2010 Trial V sample. High MPIN values (>  
 88 0.4) are marked.

| SPECIES <sup>a</sup>         | AMSUL | AMNIT | LTWS_H | CRBURN_H | GAS   | DIESEL | RNOPVRD | RNOSalt2 |
|------------------------------|-------|-------|--------|----------|-------|--------|---------|----------|
| NO <sub>3</sub> <sup>-</sup> | 0     | 1     | 0      | 0        | 0     | 0      | 0       | 0        |
| Na <sup>+</sup>              | -0.04 | 0     | -0.09  | 0.01     | 0.06  | 0      | -0.45   | 0.64     |
| K <sup>+</sup>               | 0     | 0     | 0.05   | 0.47     | -0.05 | -0.13  | 0.02    | -0.02    |
| OC                           | -0.04 | 0     | 0.71   | 0.09     | -0.11 | 0.21   | 0.08    | -0.16    |
| EC                           | -0.15 | 0     | -0.22  | -0.09    | -0.08 | 1      | -0.23   | 0        |
| Al                           | 0.03  | 0     | 0.14   | -0.03    | -0.12 | -0.07  | 0.44    | -0.11    |
| Si                           | 0.02  | 0     | 0.02   | 0        | 0.09  | -0.16  | 1       | -0.5     |
| P                            | -0.05 | 0     | -0.18  | 0.01     | 0.15  | 0.13   | -0.08   | 0.02     |
| S                            | 1     | 0     | 0      | 0        | 0     | 0      | 0       | 0        |
| Cl                           | -0.04 | 0     | 0.22   | 0.03     | 0.01  | -0.1   | -0.53   | 0.8      |
| K                            | 0.04  | 0     | 0.55   | 0.15     | -0.16 | -0.19  | 0.14    | -0.05    |
| Ca                           | -0.04 | 0     | -0.18  | 0.06     | 0.02  | 0.21   | 0.47    | -0.21    |
| Ti                           | 0.03  | 0     | 0.1    | -0.01    | -0.09 | -0.05  | 0.37    | -0.21    |
| Mn                           | -0.01 | 0     | -0.02  | 0        | 0     | -0.03  | -0.13   | 0.36     |
| Fe                           | -0.06 | 0     | -0.09  | -0.06    | -0.03 | 0.08   | -0.25   | 1        |
| Cu                           | -0.05 | 0     | -0.15  | 0.03     | 0.13  | 0.04   | -0.2    | 0.25     |
| Zn                           | -0.11 | 0     | -0.2   | 0.1      | 0.17  | 0.42   | -0.14   | -0.01    |
| As                           | 0     | 0     | 0      | 0        | 0     | 0      | 0       | 0        |
| Se                           | 0     | 0     | 0      | 0        | 0     | 0.01   | 0       | 0        |
| Br                           | -0.03 | 0     | -0.07  | 0        | 0.04  | 0.11   | -0.11   | 0.11     |
| Rb                           | 0     | 0     | -0.01  | 0.01     | 0     | 0      | 0       | 0        |
| Sr                           | 0     | 0     | 0.01   | 0        | -0.01 | 0      | 0.04    | -0.01    |
| Pb                           | -0.01 | 0     | -0.03  | 0.01     | 0.03  | 0.01   | -0.01   | 0        |
| retene                       | -0.03 | -0.01 | -0.74  | 1        | 0.09  | -0.09  | -0.04   | -0.08    |
| incdpy                       | 0.02  | 0     | 1      | -0.3     | 0.09  | -0.33  | 0.08    | -0.04    |
| bghipe                       | -0.03 | 0     | 0.18   | -0.07    | 0.24  | -0.16  | -0.06   | 0.03     |
| corone                       | -0.18 | -0.02 | -0.64  | 0.15     | 1     | -0.26  | -0.39   | 0.18     |
| hop17                        | -0.03 | 0     | 0.17   | -0.11    | -0.01 | 0.17   | -0.02   | -0.01    |
| hop19                        | -0.03 | 0     | 0.49   | -0.2     | 0.2   | -0.13  | -0.02   | 0        |
| hop26                        | 0     | 0     | -0.07  | 0.09     | 0.01  | -0.01  | 0.02    | -0.03    |
| hop27                        | 0     | 0     | -0.01  | 0.02     | 0     | 0      | 0.02    | -0.02    |
| levg                         | 0.05  | 0     | 0.76   | -0.22    | -0.17 | -0.14  | 0.14    | -0.06    |
| prist                        | -0.01 | 0     | -0.03  | 0        | -0.01 | 0.07   | -0.01   | 0        |
| phytan                       | -0.04 | 0     | -0.15  | -0.01    | -0.04 | 0.33   | -0.07   | 0        |

89  
 90

91 Table S5, continued.

| SPECIES <sup>a</sup> | AMSUL | AMNIT | LTWS_H | CRBURN_H | GAS   | DIESEL | RNOPVRD | RNOSalt2 |
|----------------------|-------|-------|--------|----------|-------|--------|---------|----------|
| NO3-                 | 0     | 1     | 0      | 0        | 0     | 0      | 0       | 0        |
| Na+                  | -0.04 | 0     | -0.02  | 0.01     | 0.03  | 0      | -0.53   | 0.74     |
| K+                   | -0.01 | 0     | -0.1   | 0.76     | -0.03 | -0.18  | -0.03   | -0.01    |
| OC                   | -0.06 | 0     | 0.48   | 0.28     | -0.08 | 0.2    | 0.01    | -0.09    |
| EC                   | -0.14 | 0     | -0.15  | -0.15    | -0.04 | 1      | -0.22   | 0.02     |
| Al                   | 0.02  | 0     | 0.09   | -0.03    | -0.07 | -0.12  | 0.5     | -0.1     |
| Si                   | 0.03  | 0     | 0.01   | -0.03    | 0.05  | -0.11  | 1       | -0.52    |
| P                    | -0.06 | 0     | -0.17  | -0.03    | 0.12  | 0.33   | -0.06   | -0.02    |
| S                    | 1     | 0     | 0      | 0        | 0     | 0      | 0       | 0        |
| Cl                   | -0.02 | 0     | 0.1    | 0.04     | -0.01 | -0.05  | -0.29   | 0.41     |
| K                    | 0.01  | 0     | 0.28   | 0.3      | -0.07 | -0.2   | 0.04    | 0        |
| Ca                   | -0.04 | 0     | -0.18  | 0.08     | 0.01  | 0.26   | 0.46    | -0.22    |
| Ti                   | 0.02  | 0     | 0.05   | 0.01     | -0.05 | -0.08  | 0.42    | -0.26    |
| Mn                   | -0.03 | 0     | 0      | 0.01     | 0     | -0.07  | -0.35   | 0.75     |
| Fe                   | -0.06 | 0     | -0.01  | -0.09    | -0.01 | 0.08   | -0.37   | 1        |
| Cu                   | -0.03 | 0     | -0.06  | 0.02     | 0.05  | 0.06   | -0.17   | 0.23     |
| Zn                   | -0.09 | 0     | -0.11  | 0.13     | 0.06  | 0.47   | -0.09   | -0.03    |
| As                   | 0     | 0     | 0      | 0        | 0     | 0      | 0       | 0        |
| Se                   | 0     | 0     | -0.01  | 0        | 0     | 0.02   | 0       | 0        |
| Br                   | -0.03 | 0     | -0.04  | -0.02    | 0.02  | 0.15   | -0.13   | 0.13     |
| Rb                   | 0     | 0     | -0.05  | 0.11     | 0     | -0.01  | 0       | -0.01    |
| Sr                   | 0     | 0     | 0      | 0.01     | -0.01 | -0.01  | 0.07    | -0.02    |
| Pb                   | -0.01 | 0     | -0.03  | 0.02     | 0.02  | 0.02   | 0       | -0.01    |
| retene               | -0.02 | 0     | -0.53  | 1        | 0.03  | -0.12  | -0.02   | -0.09    |
| incdpy               | 0.03  | 0     | 1      | -0.39    | 0.01  | -0.3   | 0.07    | 0.01     |
| bghipe               | 0     | 0     | 0.28   | -0.12    | 0.11  | -0.11  | 0       | 0.01     |
| corone               | -0.09 | 0     | -0.37  | 0.14     | 1     | -0.18  | -0.2    | 0.08     |
| hop17                | -0.03 | 0     | 0.18   | -0.16    | -0.02 | 0.2    | -0.03   | 0        |
| hop19                | -0.01 | 0     | 0.71   | -0.37    | 0.09  | -0.08  | 0.02    | 0.02     |
| hop26                | 0     | 0     | -0.1   | 0.18     | 0     | -0.02  | 0.03    | -0.04    |
| hop27                | 0     | 0     | -0.02  | 0.04     | 0     | -0.01  | 0.03    | -0.03    |
| levg                 | 0.03  | 0     | 0.65   | -0.24    | -0.1  | -0.17  | 0.07    | 0        |
| prist                | -0.01 | 0     | -0.04  | 0        | -0.01 | 0.09   | -0.02   | 0        |
| phytan               | -0.06 | 0     | -0.15  | -0.04    | -0.02 | 0.42   | -0.09   | 0        |

92

93

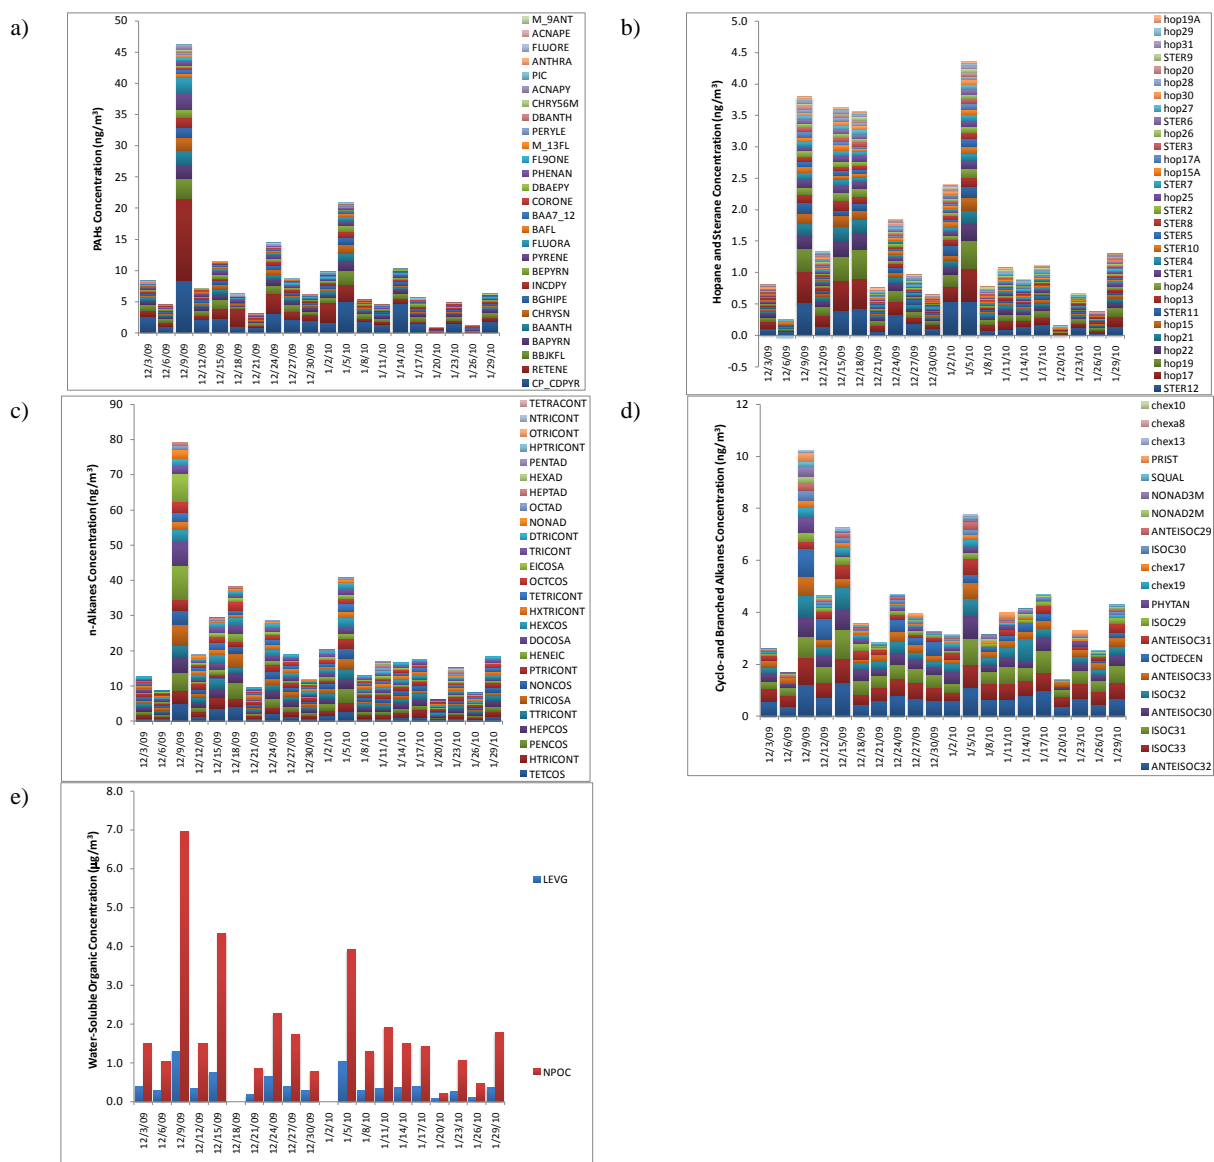

95 **Figure S1.** Concentrations of organic marker species for: a) p-PAHs, b) hopanes and steranes, c)  
 96 n-alkanes, d) cyclo- and branched alkanes, and e) water soluble organic compounds (WSOC,  
 97 npoc) and levoglucosan (levg). Species are sorted by the average abundance. See Table S0 for  
 98 details of mnemonics and chemical species.

99  
 100  
 101  
 102  
 103  
 104  
 105  
 106  
 107



## Reference List

- 108
- 109 Chow, J. C., Watson, J. G., Ashbaugh, L. L., and Magliano, K. L.: Similarities and differences in  
 110  $PM_{10}$  chemical source profiles for geological dust from the San Joaquin Valley,  
 111 California, *Atmos. Environ.*, 37, 1317-1340, 2003.
- 112 Chow, J. C., Watson, J. G., Kuhns, H. D., Etyemezian, V., Lowenthal, D. H., Crow, D. J., Kohl,  
 113 S. D., Engelbrecht, J. P., and Green, M. C.: Source profiles for industrial, mobile, and  
 114 area sources in the Big Bend Regional Aerosol Visibility and Observational (BRAVO)  
 115 Study, *Chemosphere*, 54, 185-208, 2004.
- 116 Chow, J. C., Watson, J. G., Chen, L.-W. A., Chang, M. C. O., Robinson, N. F., Trimble, D. L.,  
 117 and Kohl, S. D.: The IMPROVE\_A temperature protocol for thermal/optical carbon  
 118 analysis: Maintaining consistency with a long-term database, *J. Air Waste Manage.*  
 119 *Assoc.*, 57, 1014-1023, 2007.
- 120 Chow, J. C., Watson, J. G., Robles, J., Wang, X. L., Chen, L.-W. A., Trimble, D. L., Kohl, S. D.,  
 121 Tropp, R. J., and Fung, K. K.: Quality assurance and quality control for thermal/optical  
 122 analysis of aerosol samples for organic and elemental carbon, *Anal. Bioanal. Chem.*, 401,  
 123 3141-3152, 2011.
- 124 Fitz, D.R., Chow, J.C., and Zielinska, B.: Development of a gas and particulate matter organic  
 125 speciation profile database, prepared for California Air Resources Board, Sacramento,  
 126 CA by University of California, CE-CERT, Riverside, CA, 2004.
- 127 Fujita, E. M., Campbell, D. E., Arnott, W. P., Chow, J. C., and Zielinska, B.: Evaluations of the  
 128 chemical mass balance method for determining contributions of gasoline and diesel  
 129 exhaust to ambient carbonaceous aerosols, *J. Air Waste Manage. Assoc.*, 57, 721-740,  
 130 2007a.
- 131 Fujita, E. M., Zielinska, B., Campbell, D. E., Arnott, W. P., Sagebiel, J. C., Mazzoleni, L. R.,  
 132 Chow, J. C., Gabele, P. A., Crews, W., Snow, R., Clark, N. N., Wayne, W. S., and  
 133 Lawson, D. R.: Variations in speciated emissions from spark-ignition and compression-  
 134 ignition motor vehicles in California's south coast air basin, *J. Air Waste Manage. Assoc.*,  
 135 57, 705-720, 2007b.
- 136 Green, M.C., Chang, M.-C.O., Chow, J.C., Kuhns, H.D., Chen, L.-W.A., Nussbaum, N.J.,  
 137 Nikolic, D., Arnott, W.P., Kumar, S., and Etyemezian, V.: Las Vegas carbon source  
 138 apportionment study, final report, prepared for Clark County Department of Air Quality  
 139 Management, Las Vegas, NV by Desert Research Institute, Reno, NV, 2004.
- 140 Kuhns, H.D., Chang, M.-C.O., Chow, J.C., Etyemezian, V., Chen, L.-W.A., Nussbaum, N.J.,  
 141 Nathagoundenpalayam, S.K., Trimble, T.C., Kohl, S.D., MacLaren, M., Abu-Allaban,  
 142 M., Gillies, J.A., and Gertler, A.W.: DRI Lake Tahoe Source Characterization Study,  
 143 prepared for California Air Resources Board, Sacramento, CA by Desert Research  
 144 Institute, Reno, NV, 2004.
- 145 Watson, J. G., Chow, J. C., Lu, Z., Fujita, E. M., Lowenthal, D. H., and Lawson, D. R.: Chemical  
 146 mass balance source apportionment of  $PM_{10}$  during the Southern California Air Quality  
 147 Study, *Aerosol Sci. Technol.*, 21, 1-36, 1994.
- 148 Watson, J. G. and Chow, J. C.: Source characterization of major emission sources in the Imperial  
 149 and Mexicali valleys along the U.S./Mexico border, *Sci. Total Environ.*, 276, 33-47,  
 150 2001.
- 151 Watson, J. G., Chow, J. C., and Houck, J. E.:  $PM_{2.5}$  chemical source profiles for vehicle exhaust,  
 152 vegetative burning, geological material, and coal burning in northwestern Colorado  
 153 during 1995, *Chemosphere*, 43, 1141-1151, 2001.
